# Supplementary material for: Systematic review of burnout among healthcare providers in sub-Saharan Africa
Source: BMC Public Health. 2019 Sep 11;19:1247. doi: 10.1186/s12889-019-7566-7 (PMC6737653; doi:10.1186/s12889-019-7566-7)
Supplement: Supplementary file 1 — Table S1. Preferred Reporting Items for Systematic Review and Meta-Analyses (PRISMA) guidelines. Table S2. Database terms of search. Table S3. Quality assessment of studies on burnout among physicians in sub-Saharan Africa (N = 12). Table S4. Quality assessment of studies on burnout among nurses in sub-Saharan Africa (N = 26). Table S5. Quality assessment on burnout among healthcare workers in sub-Saharan Africa (N = 18). Table S6. Quality assessment on burnout among midwives and health professional students in sub-Saharan Africa (N = 9). (DOCX 34 kb) [file 12889_2019_7566_MOESM1_ESM.docx]

**Supplementary Table 1:** Preferred Reporting Items for Systematic Review and Meta-Analyses (PRISMA) guidelines

| **Section/topic** | **#** | **Checklist item** | **Reported on page #** |
| --- | --- | --- | --- |
| **TITLE** | | |  |
| Title | 1 | Identify the report as a systematic review, meta-analysis, or both. | 1 |
| **ABSTRACT** | | |  |
| Structured summary | 2 | Provide a structured summary including, as applicable: background; objectives; data sources; study eligibility criteria, participants, and interventions; study appraisal and synthesis methods; results; limitations; conclusions and implications of key findings; systematic review registration number. | 2-3 |
| **INTRODUCTION** | | |  |
| Rationale | 3 | Describe the rationale for the review in the context of what is already known. | 3-5 |
| Objectives | 4 | Provide an explicit statement of questions being addressed with reference to participants, interventions, comparisons, outcomes, and study design (PICOS). | 5 |
| **METHODS** | | |  |
| Protocol and registration | 5 | Indicate if a review protocol exists, if and where it can be accessed (e.g., Web address), and, if available, provide registration information including registration number. | NA |
| Eligibility criteria | 6 | Specify study characteristics (e.g., PICOS, length of follow-up) and report characteristics (e.g., years considered, language, publication status) used as criteria for eligibility, giving rationale. | 6 |
| Information sources | 7 | Describe all information sources (e.g., databases with dates of coverage, contact with study authors to identify additional studies) in the search and date last searched. | 5-6 |
| Search | 8 | Present full electronic search strategy for at least one database, including any limits used, such that it could be repeated. | Supplementary Table 2 |
| Study selection | 9 | State the process for selecting studies (i.e., screening, eligibility, included in systematic review, and, if applicable, included in the meta-analysis). | 6 |
| Data collection process | 10 | Describe method of data extraction from reports (e.g., piloted forms, independently, in duplicate) and any processes for obtaining and confirming data from investigators. | 6 |
| Data items | 11 | List and define all variables for which data were sought (e.g., PICOS, funding sources) and any assumptions and simplifications made. | 5-6 |
| Risk of bias in individual studies | 12 | Describe methods used for assessing risk of bias of individual studies (including specification of whether this was done at the study or outcome level), and how this information is to be used in any data synthesis. | NA |
| Summary measures | 13 | State the principal summary measures (e.g., risk ratio, difference in means). | 6 |
| Synthesis of results | 14 | Describe the methods of handling data and combining results of studies, if done, including measures of consistency (e.g., I2) for each meta-analysis. | NA |
| Risk of bias across studies | 15 | Specify any assessment of risk of bias that may affect the cumulative evidence (e.g., publication bias, selective reporting within studies). | NA |
| Additional analyses | 16 | Describe methods of additional analyses (e.g., sensitivity or subgroup analyses, meta-regression), if done, indicating which were pre-specified. | NA |
| **RESULTS** | | |  |
| Study selection | 17 | Give numbers of studies screened, assessed for eligibility, and included in the review, with reasons for exclusions at each stage, ideally with a flow diagram. | 7, Figure 1 |
| Study characteristics | 18 | For each study, present characteristics for which data were extracted (e.g., study size, PICOS, follow-up period) and provide the citations. | 7 |
| Risk of bias within studies | 19 | Present data on risk of bias of each study and, if available, any outcome level assessment (see item 12). | NA |
| Results of individual studies | 20 | For all outcomes considered (benefits or harms), present, for each study: (a) simple summary data for each intervention group (b) effect estimates and confidence intervals, ideally with a forest plot. | 8-16, Tables 1-4 |
| Synthesis of results | 21 | Present results of each meta-analysis done, including confidence intervals and measures of consistency. | NA |
| Risk of bias across studies | 22 | Present results of any assessment of risk of bias across studies (see Item 15). | NA |
| Additional analysis | 23 | Give results of additional analyses, if done (e.g., sensitivity or subgroup analyses, meta-regression [see Item 16]). | Supplementary Tables 3-6 |
| **DISCUSSION** | | |  |
| Summary of evidence | 24 | Summarize the main findings including the strength of evidence for each main outcome; consider their relevance to key groups (e.g., healthcare providers, users, and policy makers). | 16 |
| Limitations | 25 | Discuss limitations at study and outcome level (e.g., risk of bias), and at review-level (e.g., incomplete retrieval of identified research, reporting bias). | 17-18 |
| Conclusions | 26 | Provide a general interpretation of the results in the context of other evidence, and implications for future research. | 19 |
| **FUNDING** | | |  |
| Funding | 27 | Describe sources of funding for the systematic review and other support (e.g., supply of data); role of funders for the systematic review. | 21 |

*From:*  Moher D, Liberati A, Tetzlaff J, Altman DG, The PRISMA Group (2009). Preferred Reporting Items for Systematic Reviews and Meta-Analyses: The PRISMA Statement. PLoS Med 6(7): e1000097. doi:10.1371/journal.pmed1000097 (139)

**Supplementary Table 2**. Database terms of search

| **PubMed (N=257)** |
| --- |
| ("Burnout, Psychological"[Mesh] OR "Burnout, Professional"[Mesh] OR "Compassion fatigue"[mesh] OR burnout[tiab] OR burning out[tiab] OR burn out[tiab] OR emotional exhaustion[tiab] OR secondary trauma*[tiab] OR vicarious trauma*[tiab] OR compassion fatigue[tiab])  AND  ("Africa South of the Sahara"[Mesh] OR africa[all fields] OR angola[all fields] OR benin[all fields] OR botswana[all fields] OR burkina faso[all fields] OR burundi[all fields] OR cabo verde[all fields] OR cameroon[all fields] OR central african republic[all fields] OR chad[all fields] OR congo[all fields] OR cote d'ivoire[all fields] OR djibouti[all fields] OR eritrea[all fields] OR ethiopia[all fields] OR gabon[all fields] OR gambia[all fields] OR ghana[all fields] OR guinea[all fields] OR ivory coast[all fields] OR kenya[all fields] OR lesotho[all fields] OR liberia[all fields] OR malawi[all fields] OR mali[all fields] OR mauritania[all fields] OR mozambique[all fields] OR namibia[all fields] OR niger[all fields] OR nigeria[all fields] OR rwanda[all fields] OR sao tome and principe[all fields] OR senegal[all fields] OR sierra leone[all fields] OR somalia[all fields] OR sudan[all fields] OR swaziland[all fields] OR tanzania[all fields] OR togo[all fields] OR uganda[all fields] OR zambia[all fields] OR zimbabwe[all fields]) |
| **PsycINFO (N=384)** |
| (DE ("Occupational Stress" OR "Compassion Fatigue") OR TI ("burnout" OR "burning out" OR "burn out" OR "emotional exhaustion" OR "secondary trauma*" OR "vicarious trauma*" OR "compassion fatigue") OR AB ("burnout" OR "burning out" OR "burn out" OR "emotional exhaustion" OR "secondary trauma*" OR "vicarious trauma*" OR "compassion fatigue"))  AND  (TX ("africa" OR "angola" OR "benin" OR "botswana" OR "burkina faso" OR "burundi" OR "cabo verde" OR "cameroon" OR "central african republic" OR "chad" OR "congo" OR "cote d'ivoire" OR "djibouti" OR "eritrea" OR "ethiopia" OR "gabon" OR "gambia" OR "ghana" OR "guinea" OR "ivory coast" OR "kenya" OR "lesotho" OR "liberia" OR "malawi" OR "mali" OR "mauritania" OR "mozambique" OR "namibia" OR "niger" OR "nigeria" OR "rwanda" OR "sao tome and principe" OR "senegal" OR "sierra leone" OR "somalia" OR "sudan" OR "swaziland" OR "tanzania" OR "togo" OR "uganda" OR "zambia" OR "zimbabwe")) |
| **Web of Science (N=322)** |
| TS=("burnout" OR "burning out" OR "burn out" OR "emotional exhaustion" OR "secondary trauma*" OR "vicarious trauma*" OR "compassion fatigue")  AND  TS=("africa" OR "angola" OR "benin" OR "botswana" OR "burkina faso" OR "burundi" OR "cabo verde" OR "cameroon" OR "central african republic" OR "chad" OR "congo" OR "cote d'ivoire" OR "djibouti" OR "eritrea" OR "ethiopia" OR "gabon" OR "gambia" OR "ghana" OR "guinea" OR "ivory coast" OR "kenya" OR "lesotho" OR "liberia" OR "malawi" OR "mali" OR "mauritania" OR "mozambique" OR "namibia" OR "niger" OR "nigeria" OR "rwanda" OR "sao tome and principe" OR "senegal" OR "sierra leone" OR "somalia" OR "sudan" OR "swaziland" OR "tanzania" OR "togo" OR "uganda" OR "zambia" OR "zimbabwe") |

*[Sub-Saharan Africa countries via World Bank* [*https://data.worldbank.org/region/sub-saharan-africa*](https://data.worldbank.org/region/sub-saharan-africa)*]*

**Supplementary Table 3.** Quality assessment based on modified Newcastle-Ottawa Scale of studies on burnout among physicians in sub-Saharan Africa (N = 12).

| **Study Characteristics** | | **Newcastle-Ottawa Scale†** | | |
| --- | --- | --- | --- | --- |
| **First author and year** | **Type of study** | **Selection** | **Comparability** | **Exposure/Outcome** |
| Coker, 2010 | cross-sectional | ** | - | * |
| Liebenberg, 2018 | cross-sectional | ** | - | ** |
| Lrago, 2018 | cross-sectional | *** | ** | ** |
| Ogundipe, 2014 | cross-sectional | ***** | * | ** |
| Opoku, 2014 | cross-sectional | **** | * | ** |
| Peltzer, 2003 | cross-sectional | *** | - | ** |
| Rajan, 2018 | cross-sectional | *** | - | ** |
| Schweitzer, 1994 | cross-sectional | *** | - | * |
| Stassen, 2012 | cross-sectional | * | - | ** |
| Stodel, 2011 | cross-sectional / mixed methods | ** | - | * |
| Ugwu, 2019 | cross-sectional | *** | ** | ** |
| van der Walt, 2015 | cross-sectional | *** | - | ** |

**†** Study quality was assessed using a modified NOS for cross-sectional studies (51).

Cross-sectional study maximum score: Selection (5), Comparability (2), Outcome (3); Total = 10

**Supplementary Table 4.** Quality assessment based on modified Newcastle-Ottawa Scale of studies on burnout among nurses in sub-Saharan Africa (N = 26).

| **Study Characteristics** | | **Newcastle-Ottawa Scale†** | | |
| --- | --- | --- | --- | --- |
| **First author and year** | **Type of study** | **Selection** | **Comparability** | **Exposure/Outcome** |
| Amoo, 2008 | cross-sectional | **** | ** | ** |
| Asiedu, 2018 | cross-sectional | ** | ** | ** |
| Buitendach, 2011 | cross-sectional | * | ** | ** |
| Coetzee, 2013 | cross-sectional | **** | ** | ** |
| Davhana-Maselesele, 2008 | cross-sectional | ** | - | * |
| Engelbrecht, 2008 | cross-sectional | ***** | ** | ** |
| Ezenwaji, 2019 | cross-sectional | *** | ** | ** |
| Gandi, 2011 | cross-sectional | ** | - | * |
| Gorgens-Ekermans, 2012 | cross-sectional | **** | * | ** |
| Heyns, 2003 | cross-sectional | ** | ** | ** |
| Ifeagwazi, 2006 | cross-sectional | *** | - | ** |
| Khamisa, 2015 | cross-sectional | ** | - | * |
| Lasebikan, 2012 | cross-sectional | ***** | * | ** |
| Levert, 2000 | cross-sectional | * | - | ** |
| Mashego, 2016 | cross-sectional | * | - | ** |
| Mbambo, 2003 | cross-sectional | *** | - | ** |
| Mbanga, 2018 | cross-sectional | * | * | ** |
| Mefoh, 2018 | cross-sectional | **** | * | ** |
| Okwaraji, 2014 | cross-sectional | **** | * | * |
| Pienaar, 2011 | cross-sectional | ***** | - | ** |
| Roomaney, 2017 | cross-sectional | **** | * | ** |
| van der Colff, 2014 | cross-sectional | **** | ** | ** |
| van der Doef, 2012 | cross-sectional | **** | - | * |
| van Doorn, 2016 | cross-sectional | ** | ** | ** |
| van Wijk, 1997 | cross-sectional / mixed methods | * | - | * |
| Wilson, 1989 | cross-sectional | ** | - | * |

**†** Study quality was assessed using a modified NOS for cross-sectional studies (51).

Cross-sectional study maximum score: Selection (5), Comparability (2), Outcome (3); Total = 10

**Supplementary Table 5.** Quality assessment based on the Newcastle-Ottawa Scale on burnout among healthcare workers in sub-Saharan Africa (N = 18).

| **Study Characteristics** | | **Newcastle-Ottawa Scale†** | | |
| --- | --- | --- | --- | --- |
| **First author and year** | **Type of study** | **Selection** | **Comparability** | **Exposure/Outcome** |
| Bhagavathula, 2018 | cross-sectional | ***** | ** | ** |
| Biksegn, 2016 | cross-sectional | ** | - | * |
| Bonenberger, 2014 | cross-sectional | **** | ** | ** |
| Crabbe, 2004 | cross-sectional | *** | - | * |
| Fiadzo, 1997 | cross-sectional | * | - | * |
| Kim, 2018 | cross-sectional | ***** | ** | ** |
| Kokonya, 2014 | cross-sectional | *** | - | * |
| Kruse, 2009 | cross-sectional / mixed methods | ** | ** | ** |
| Ledikwe, 2018 | cross-sectional | *** | ** | ** |
| McAuliffe, 2009 | cross-sectional | *** | * | ** |
| Mutale, 2013 | cross-sectional | ***** | ** | ** |
| Ndetei, 2008 | cross-sectional | *** | - | * |
| Nel, 2013 | cross-sectional | ** | ** | ** |
| Ojedokun, 2013 | cross-sectional | ** | - | * |
| Olley, 2003 | cross-sectional | *** | - | * |
| Thorsen, 2011 | cross-sectional | ***** | ** | ** |
| Weldegebriel, 2016 | cross-sectional | **** | ** | ** |
|  |  |  |  |  |
|  |  | **Cochrane Risk of Bias Tool†** | | |
| Madede, 2017 | Cluster RCT | fair quality | | |

**†** Study quality was assessed using a modified NOS for cross-sectional studies (51) and the Cochrane Risk of Bias Tool for randomized controlled trials (53).

Cross-sectional study maximum score: Selection (5), Comparability (2), Outcome (3); Total = 10

**Supplementary Table 6.** Quality assessment based on the Newcastle-Ottawa Scale on burnout among midwives and health professional students in sub-Saharan Africa (N = 9).

| **Study Characteristics** | | **Newcastle-Ottawa Scale†** | | |
| --- | --- | --- | --- | --- |
| **First author and year** | **Type of study** | **Selection** | **Comparability** | **Exposure/Outcome** |
| Midwives (N=2) | | | | |
| Muliira, 2016 | cross-sectional | ***** | - | ** |
| Rouleau, 2012 | cohort | *** | ** | * |
| Medical and nursing students (N=7) | | | | |
| Colby, 2018 | cross-sectional | *** | - | ** |
| Gordon, 2016 | cross-sectional | *** | - | * |
| Mason, 2012 | cross-sectional | * | - | ** |
| Mathias, 2017 | cross-sectional | ** | - | * |
| Njim, 2018 | cross-sectional | *** | ** | ** |
| Njim, 2019 | cross-sectional | *** | ** | ** |
| Stein, 2016 | cross-sectional | ** | - | ** |

**†** Study quality was assessed using a modified NOS for cross-sectional studies (51) and a NOS scale for cohort studies (52) .

Cross-sectional study maximum score: Selection (5), Comparability (2), Outcome (3); Total = 10

Cohort study maximum score: Selection (4), Comparability (2), Outcome (3); Total = 9
